# Mitogenomes Uncover Extinct Penguin Taxa and Reveal Island Formation as a Key Driver of Speciation

Theresa L. Cole,<sup>\*,1,2</sup> Daniel T. Ksepka,<sup>†,3</sup> Kieren J. Mitchell,<sup>†,4</sup> Alan J.D. Tennyson,<sup>†,5</sup> Daniel B. Thomas,<sup>†,6</sup> Hailin Pan,<sup>7,8,9</sup> Guojie Zhang,<sup>7,8,9</sup> Nicolas J. Rawlence,<sup>1</sup> Jamie R. Wood,<sup>2</sup> Pere Bover,<sup>4,10</sup> Juan L. Bouzat,<sup>11</sup> Alan Cooper,<sup>4</sup> Steven R. Fiddaman,<sup>12</sup> Tom Hart,<sup>12</sup> Gary Miller,<sup>13,14</sup> Peter G. Ryan,<sup>15</sup> Lara D. Shepherd,<sup>5</sup> Janet M. Wilmshurst,<sup>2,16</sup> and Jonathan M. Waters<sup>1</sup>

<sup>1</sup>Department of Zoology, University of Otago, Dunedin, New Zealand

<sup>2</sup>Manaaki Whenua Landcare Research, Lincoln, Canterbury, New Zealand

<sup>3</sup>Bruce Museum, Greenwich, CT

<sup>4</sup>Australian Centre for Ancient DNA, School of Biological Sciences, University of Adelaide, Adelaide, SA, Australia

<sup>5</sup>Museum of New Zealand Te Papa Tongarewa, Wellington, New Zealand

<sup>6</sup>Institute of Natural and Mathematical Sciences, Massey University, Auckland, New Zealand

<sup>7</sup>State Key Laboratory of Genetic Resources and Evolution, Kunming Institute of Zoology, Chinese Academy of Sciences, Kunming, China

<sup>8</sup>China National Genebank, BGI-Shenzhen, Shenzhen, Guangdong, China

<sup>9</sup>Centre for Social Evolution, Department of Biology, University of Copenhagen, Copenhagen, Denmark

<sup>10</sup>ARAID Foundation, IUCA-Grupo Aragosaurus, Universidad de Zaragoza, Zaragoza, Spain

<sup>11</sup>Department of Biological Sciences, Bowling Green State University, Bowling Green, OH, USA

<sup>12</sup>Department of Zoology, University of Oxford, Oxford, United Kingdom

<sup>13</sup>Division of Pathology and Laboratory Medicine, University of Western Australia, Crawley, WA, Australia

<sup>14</sup>Institute for Marine and Antarctic Studies, University of Tasmania, Hobart, TAS, Australia

<sup>15</sup>DST-NRF Centre of Excellence, FitzPatrick Institute of African Ornithology, University of Cape Town, Rondebosch, South Africa

<sup>16</sup>School of Environment, University of Auckland, Auckland, New Zealand

<sup>†</sup>These authors contributed equally to this work.

\*Corresponding author: E-mail: tesscole1990@gmail.com.

Associate editor: Beth Shapiro

## Abstract

The emergence of islands has been linked to spectacular radiations of diverse organisms. Although penguins spend much of their lives at sea, they rely on land for nesting, and a high proportion of extant species are endemic to geologically young islands. Islands may thus have been crucial to the evolutionary diversification of penguins. We test this hypothesis using a fossil-calibrated phylogeny of mitochondrial genomes (mitogenomes) from all extant and recently extinct penguin taxa. Our temporal analysis demonstrates that numerous recent island-endemic penguin taxa diverged following the formation of their islands during the Plio-Pleistocene, including the Galápagos (Galápagos Islands), northern rock-hopper (Gough Island), erect-crested (Antipodes Islands), Snares crested (Snares) and royal (Macquarie Island) penguins. Our analysis also reveals two new recently extinct island-endemic penguin taxa from New Zealand's Chatham Islands: *Eudyptes warhami* sp. nov. and a dwarf subspecies of the yellow-eyed penguin, *Megadyptes antipodes richdalei* ssp. nov. *Eudyptes warhami* diverged from the Antipodes Islands erect-crested penguin between 1.1 and 2.5 Ma, shortly after the emergence of the Chatham Islands (~3 Ma). This new finding of recently evolved taxa on this young archipelago provides further evidence that the radiation of penguins over the last 5 Ma has been linked to island emergence. Mitogenomic analyses of all penguin species, and the discovery of two new extinct penguin taxa, highlight the importance of island formation in the diversification of penguins, as well as the extent to which anthropogenic extinctions have affected island-endemic taxa across the Southern Hemisphere's isolated archipelagos.

**Key words:** Sphenisciformes, ancient DNA, fossil calibrations, *Eudyptes warhami*, *Megadyptes antipodes richdalei*.

## Introduction

Biologists have long considered oceanic islands as natural "laboratories" for evolutionary studies (Darwin 1859), with

archipelago formation underpinning dramatic biological radiations in many remote regions of the globe (Shaw and Gillespie 2016). In particular, numerous studies have

highlighted island isolation as a crucial prerequisite for species formation and adaptive radiation (Darwin 1859; Cowie and Holland 2006; Losos and Ricklefs 2009; Bacon et al. 2012). Soon after emergence, islands (whether volcanic or tectonic in origin) (Paulay 1994) can be rapidly colonized by diverse arrays of dispersing taxa (Fleischer et al. 1998; Gathorne-Hardy et al. 2000; Mendelson and Shaw 2005; Gillespie et al. 2012), presenting unique opportunities for local adaptation and diversification of species (Waters et al. 2013). The resultant island-endemic taxa can also be particularly prone to extinction (Cowie and Holland 2006; Shaw and Gillespie 2016; Wood et al. 2017).

Penguins (Sphenisciformes) are iconic flightless marine birds that inhabit all major landmasses and many islands in the Southern Hemisphere (fig. 1a). Approximately 20 extant species are recognized, with some debate over species boundaries between recently diverged populations. The group has a rich fossil record extending back >60 Ma (Slack et al. 2006), with over 50 extinct species documented (Ksepka et al. 2012). Several phylogenetic studies have attempted to pinpoint the timing, and thereby the drivers, of penguin diversification (Baker et al. 2006; Ksepka et al. 2006; Subramanian et al. 2013; Gavryushkina et al. 2017; Frugone et al. 2018). Previous studies have invoked circumpolar ocean currents and/or Antarctic cooling as key drivers of penguin evolution and biogeography (Baker et al. 2006; Frugone et al. 2018). However, one-third of all extant penguin species are endemic to geologically young islands (<5 Ma; Maund et al. 1988; Gamble and Morris 1989; Adamson et al. 1996; Sinton et al. 2018) suggesting that founder speciation may also have played an important role in recent penguin cladogenesis. An alternative explanation is that island endemic penguins represent relictual populations of formerly more widespread species.

Here, we test these competing hypotheses using 41 near-complete mitochondrial genomes (mitogenomes), representing all extant and recently extinct penguin taxa. By using well-justified fossil calibrations, we resolve the timing and mechanisms of modern penguin diversification. We demonstrate that many penguin divergences correlate with the formation of islands, providing a new model for understanding penguin evolution. Furthermore, we describe two new recently extinct penguin taxa from the Chatham Islands, demonstrating that while islands have been key in many recent penguin speciation events, the resulting restricted distributions have also made such lineages particularly susceptible to anthropogenic extinction.

## Results

### Genetic Evidence for Two Extinct Penguin Lineages from the Chatham Islands

We analyzed 65 bones (supplementary table S1, Supplementary Material online) from the Chatham Islands to test for the existence of an extinct endemic crested penguin (*Eudyptes*) species, as proposed by Tennyson and Millener (1994) based on morphological evidence. Most were poorly preserved, but we obtained partial cytochrome

*oxidase subunit I (COI)* sequences from 22, and partial *control region (CR)* sequences from eight. Phylogenetic analyses of these data identified erect-crested penguin (*Eudyptes sclateri*) and two other distinct genetic lineages: one corresponding to *Eudyptes* clade X (Cole et al. 2019), and another within the yellow-eyed penguin genus *Megadyptes* (supplementary figs. S1–S4, Supplementary Material online). The latter discovery was unexpected, as the bones had appeared too small to belong to *Megadyptes* and thus had originally been identified as *Eudyptes*.

### Mitochondrial Phylogenetic Analysis

Phylogenetic analysis of near-complete mitogenomes recovered a clade grouping the two largest bodied and most polar-adapted penguin genera, *Aptenodytes* and *Pygoscelis*, as sister to all other extant penguins (supplementary figs. S5–S9, Supplementary Material online). This basal split was also found in two recent studies (Subramanian et al. 2013; Gavryushkina et al. 2017), whereas others have recovered *Aptenodytes* as an independent lineage, sister to all other extant penguins (Bertelli and Giannini 2005; Baker et al. 2006; Ksepka et al. 2006). Our phylogeny agrees with previous studies in recovering *Spheniscus* + *Eudyptula* and *Eudyptes* + *Megadyptes* clades (Bertelli and Giannini 2005; Baker et al. 2006; Ksepka et al. 2006). The Chathams *Eudyptes* taxon is distinct, sister to *E. sclateri* (posterior probability: 1.0). The individuals recognized as *Eudyptes* clade X from mainland New Zealand (Cole et al. 2019) belong to this newly recognized species. We also found that individuals belonging to the previously unrecognized dwarf Chathams *Megadyptes* taxon form a monophyletic clade (posterior probability: 0.88), though their precise phylogenetic relationship to the other *Megadyptes* lineages could not be confidently resolved (supplementary fig. S5, Supplementary Material online).

### Pairwise Distances and Taxonomic Status

To explore genetic divergences and potential taxonomic status of penguin lineages, we compared mitogenomes in a pairwise matrix, excluding positions with missing data (fig. 1b and supplementary tables S2 and S3, Supplementary Material online). The Chathams *Eudyptes* and the erect-crested penguin (*E. sclateri*) are 1.9% divergent, with 268 differential SNPs between the two species. In contrast, we observed just 0.2% divergence between the closely related (Christidis and Boles 2008) royal penguin (*E. chrysolophus schlegeli*) and macaroni penguin (*E. c. chrysolophus*). Despite clear phenotypic differences (Shaughnessy 1975; Warham 1975; Woehler 1995), it appears that these genetically similar lineages may still be in the earliest stages of diversification, supporting the conclusions of Frugone et al. (2018). Our data reveal more substantial divergences among three rockhopper penguin species (De Dinechin et al. 2009): the southern rockhopper (*E. chrysocome*) and eastern rockhopper (*E. filholi*) penguins are 0.7% divergent, and both show 1.8% divergence relative to the northern rockhopper penguin (*E. moseleyi*). The recently proposed recognition of two little penguin taxa (Grosser et al. 2017) is supported by 2.9% divergence detected between *Eudyptula minor* and *E. novaehollandiae*.

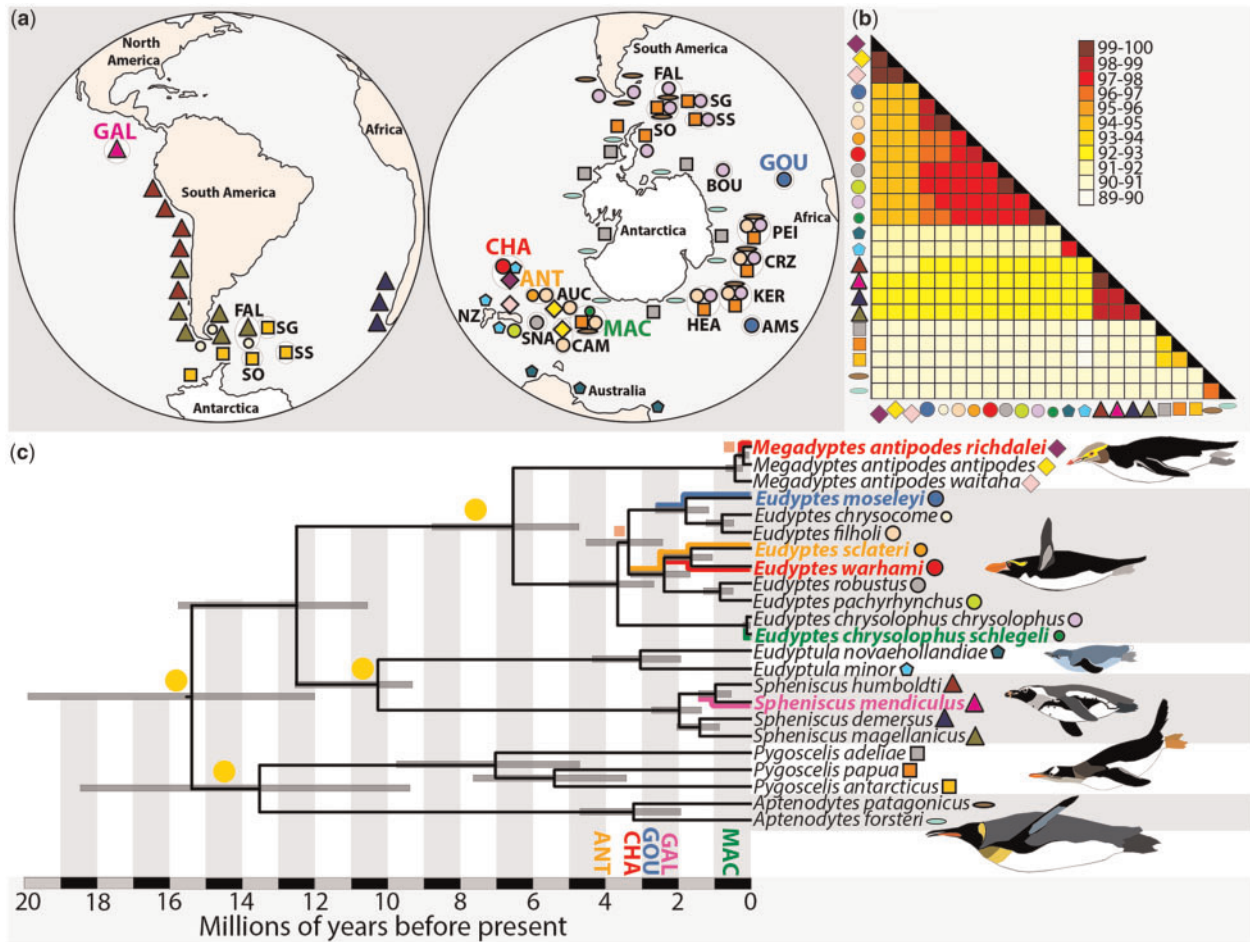

**Fig. 1.** (a) Maps of penguin breeding ranges, adapted from Ramos et al. (2018). Only the prehuman breeding range of *Megadyptes antipodes* is shown. GAL, Galápagos Islands; FAL, Falkland Islands; SG, South Georgia; SS, South Sandwich Islands; SO, South Orkney Islands; BOU, Bouvet; GOU, Gough Island; TDC, Tristan da Cunha; PEI, Prince Edward Islands; CRZ, Crozet Islands; KER, Kerguelen Islands; HEA, Heard Island; AMS, Amsterdam and St Paul Islands; MAC, Macquarie Island; CAM, Campbell Island; SNA, Snares; AUC, Auckland Islands; ANT, Antipodes Islands; CHA, Chatham Islands; NZ, New Zealand. (b) Heatmap showing the percentage of pairwise genetic similarity calculated from 14,117 bp of 23 crown penguin mitogenomes (excluding all alignment columns containing missing data). (c) Dated phylogeny of penguins inferred from mitogenomes. Fossil calibrations are marked with large yellow circles. Posterior probabilities for all clades were >0.99, except those marked with small (orange) squares (0.88 for *Megadyptes* and 0.74 for *Eudyptes*). 95% Highest Posterior Densities are shown as bars associated with each node. The divergence dates of the emergence of the five island archipelagos (colored in concordance to their respective taxa) are shown under the phylogeny. Taxon-specific symbols are consistent between (a), (b), and (c). For colour figures please refer to the online version of this article.

*Megadyptes antipodes* and the new Chathams *Megadyptes* taxon had only 0.1% sequence divergence, and both were 0.3% divergent from *M. waitaha*. These values are substantially smaller than the divergences observed between some other sister species pairs of extant penguins (mean 2.2%, range 0.8–5.2%; supplementary table S3, Supplementary Material online). In contrast, the Chathams *Eudyptes* taxon was 1.9% divergent from its sister species *E. sclateri*, a value exceeding those between sister-pairs of several widely accepted penguin species (e.g., *E. robustus* and the Fiordland crested penguin [*E. pachyrhynchus*] are 0.8% divergent).

### Calibrated Phylogenetic Analysis

Our divergence estimates of major phylogenetic clades are consistent with the proposed Miocene origin of crown penguins (Subramanian et al. 2013; Gavryushkina et al. 2017), and show that a large proportion of penguin species (16 out of 23

studied taxa) have diverged over the past 2 Ma (fig. 1c and supplementary table S4, Supplementary Material online). While some divergence time estimates substantially postdate island formation, we observed no instances where an island-endemic penguin diverged from its sister taxon prior to the corresponding island group emergence (see fig. 1c and supplementary table S4 and figs. S7–S9, Supplementary Material online, for alternative calibration approaches).

### Systematic Paleontology

Morphological observations (supplementary tables S5–S10, Supplementary Material online), combined with our molecular results, support recognition of the Chathams *Eudyptes* (originally proposed by Tennyson and Millener 1994, with more detailed morphological support provided by Millener (1999) as a distinct species and the dwarf Chathams *Megadyptes* as a subspecies of the extant *Megadyptes antipodes* (fig. 2).

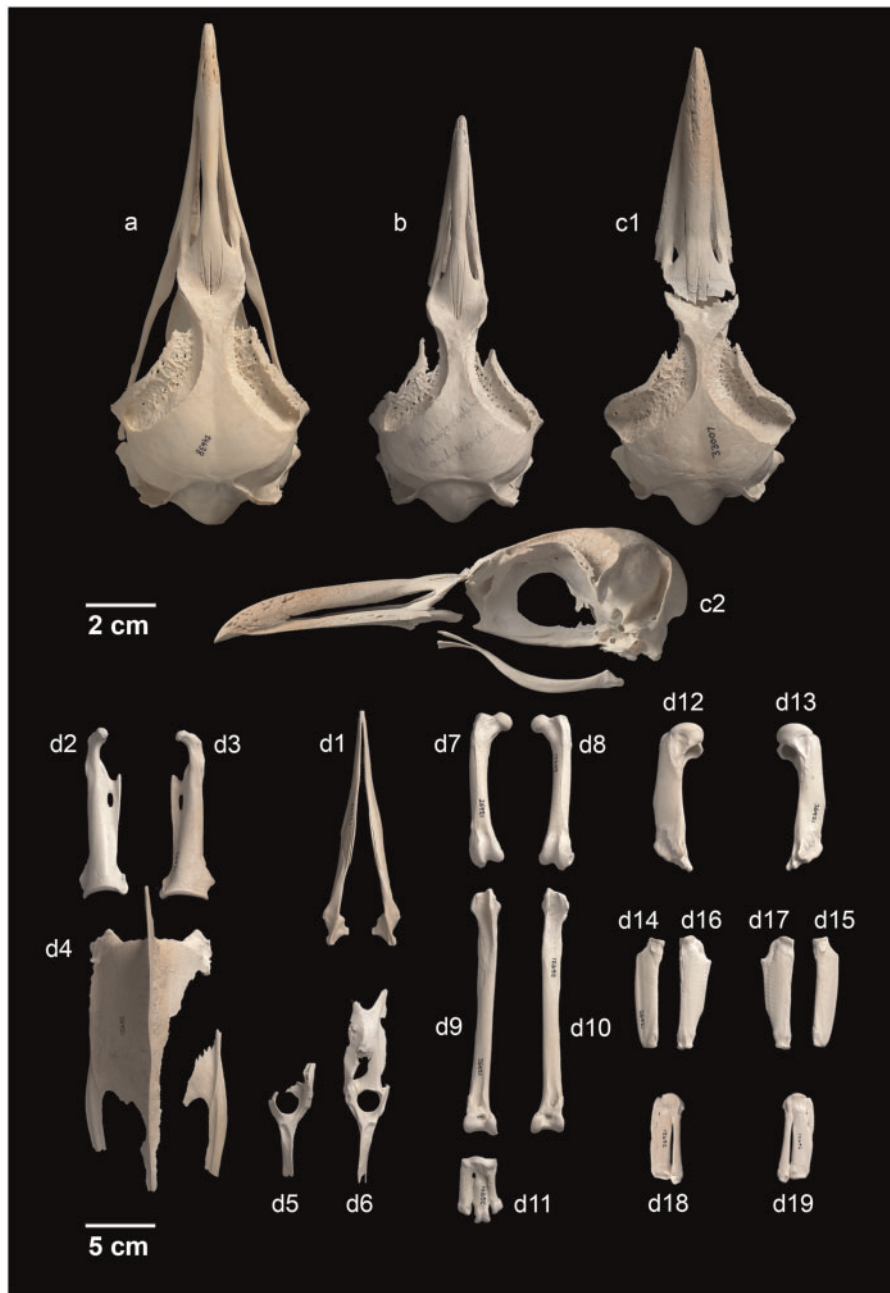

**Fig. 2.** Skulls of (a) *Megadyptes antipodes antipodes*: NMNZ OR.24638; (b) *Megadyptes antipodes richdalei* paratype: NMNZ S.45876 (AD88); (c) *Eudyptes warhami* holotype: NMNZ S.33007 (AD161) in (c1) dorsal view and (c2) left lateral view (jugal bar is disarticulated); (d) *Megadyptes antipodes richdalei* holotype: NMNZ S.26921 (AD95); (d1) mandible in ventral view, (d2) right and (d3) left coracoid in ventral view, (d4) sternum in ventral view, (d5) left and (d6) right side of pelvis in medial view, (d7) right and (d8) left femur in cranial view, (d9) right and (d10) tibiotarsus in cranial view, (d11) right tarsometatarsus in cranial view, (d12) left and (d13) right humerus in caudal view, (d14) left and (d15) right radius in dorsal view, (d16) left and (d17) right ulna in dorsal view, (d18) left and (d19) right carpometacarpus in dorsal view. Photos: Jean-Claude Stahl, Te Papa. For colour figures please refer to the online version of this article.

Aves Linnaeus, 1758  
Sphenisciformes Sharpe, 1891

*Eudyptes* Vieillot, 1816

*Eudyptes warhami*, n. sp. Cole, Tennyson, Ksepka & Thomas

**Holotype.** NMNZ S.33007. Skull (fig. 2c1 and c2).

**Etymology.** The specific epithet honors John Warham (1919–2010), who carried out pioneering studies on *Eudyptes* penguins.

**Type locality.** Foredune c.200 m west of Tahatika Creek, Chatham Island. Collected by P.R. Millener, January 20, 1993. Age: <7,000 years BP; the maximum age of the dunes. An *Anas chathamica* bone from the site dates to  $1,529 \pm 57$   $^{14}\text{C}$  years BP (1,405–1,185 cal BP) (Millener 1999).

**Paratype and Stratigraphic context.** All bones in the type series are from Chatham Island unless otherwise stated: NMNZ S.24277, left carpometacarpus; NMNZ S.25157, right humerus; NMNZ S.26908, skull; NMNZ S.27259, right coracoid, Chatham Islands; NMNZ S.47917, left coracoid; NMNZ

S.30440, mandible; NMNZ S.47921, left tibiotarsus, Mangere Island; CM Av.6816, largely complete skull, Chatham Islands; CM Av.27407, left humerus; CM Av.27867, left humerus (supplementary fig. S10, Supplementary Material online). Most bones in the type series were isolated elements collected from eroded dune surfaces. However, the paratype from Mangere Island was from a soil deposit that contained European-era remains (but had possible rabbit disturbance). No *E. warhami* bones were found in association.

**Diagnosis.** Characterized by elongate ovoid premaxilla in dorsal view and relatively shallow mandible. Distinguished from *E. chrysocome*, *E. filholi*, and *E. moseleyi* by larger size (supplementary table S5, Supplementary Material online). The largest specimens, including the holotype, rival the largest extant *Eudyptes* taxon (*E. chrysolophus schlegeli*). Distinguished from *E. pachyrhynchus* and *E. robustus* by relatively elongate premaxilla. Distinguished from *E. chrysolophus chrysolophus* and *E. chrysolophus schlegeli* by proportionally shallower mandible. Distinguished from *E. sclateri* by more bowed premaxilla (dorsally) and notably shallower mandible. Distinguished from the Pliocene *Eudyptes calauina* by smaller and more slender humerus (max. length 70 mm in *E. warhami* vs. ~81 mm in *E. calauina*).

**Distribution.** Presumably once widespread along coastlines of the Chatham archipelago. The type series includes specimens from northern Chatham Is. (43.71°S) to Mangere Is. (44.27°S). The referred specimen series (see Supplementary Material online) indicates that the species ranged westward to the east coast of mainland New Zealand.

**Description.** As typical of larger *Eudyptes* species, the beak of *E. warhami* is more elongate than in smaller congeners. The rostral portion of the upper beak is markedly swollen as in *Eudyptes* and unlike *Megadyptes*. The jugal bar is strongly curved (fig. 2c2 and supplementary fig. S10, Supplementary Material online) as in *Eudyptes*, and more so than in *Megadyptes*. The deep salt gland fossae are bounded by a shelf of bone. The mandibular ramus deepens strongly near the midpoint; a feature observed within *Eudyptes* and *Pygoscelis* penguins that is associated with a preference for planktonic prey (Zusi 1975). Similar to extant *Eudyptes* species, the coracoidal fenestra is completely enclosed by a bridge of bone extending from the procoracoid process. The humerus is relatively wide, lacks a pronounced notch between the head and the dorsal tubercle, and has a posterior trochlear process which projects beyond the ventral border of the shaft.

***Megadyptes*** Milne-Edwards, 1880

***Megadyptes antipodes*** (Hombron & Jacquinot, 1841)

***Megadyptes antipodes richdalei*** n. ssp., Tennyson & Cole

**Holotype.** NMNZ S.26921. Partial skeleton (fig. 2d and supplementary fig. S11, Supplementary Material online).

**Etymology.** The subspecies epithet honors Lance Richdale (1900–1983), who carried out pioneering studies on *Megadyptes* ecology.

**Type locality.** Fore dune east of Maunganui, Chatham Is. Collected by P.R. Millener, February 21, 1989. Age: <7000 years BP; the maximum age of the dunes.

A *Diaphorapteryx hawkinsi* bone from the site dates to  $1,860 \pm 150$   $^{14}\text{C}$  years BP (1,996–1,314 cal BP) (Millener 1999).

**Paratype and Stratigraphic context.** All bones in the type series were collected from eroded dune surfaces and were from the Chatham archipelago unless otherwise stated: NMNZ S.47918 right coracoid; NMNZ S.30968, mandible; NMNZ S.47765, premaxilla; NMNZ S.45876, skull (fig. 2b); CM Av11287, left humerus; CM (ACAD12997; unregistered) (supplementary fig. S12, Supplementary Material online), left humerus; AM LB12063, proximal left tibiotarsus, Pitt Island.

**Diagnosis.** A *Megadyptes* penguin, smaller than both described *Megadyptes* taxa (*M. antipodes* and *M. waitaha*) (supplementary tables S6–S10, Supplementary Material online). *Megadyptes antipodes richdalei* n. ssp. represents a genetic lineage comprising distinct haplotypes ( $\geq 15$  private mitochondrial SNPs) not detected in other living or extinct *Megadyptes* populations (supplementary fig. S4 and tables S2 and S3, Supplementary Material online).

**Distribution.** Chatham and Pitt Islands (from 43.73°S to 44.23°S). Presumably occurred around all coasts of the Chatham archipelago.

**Description.** *Megadyptes antipodes richdalei* is the smallest *Megadyptes* penguin, being on an average smaller than *M. waitaha* (fig. 2b and supplementary tables S6 and S7, Supplementary Material online) (though size distributions overlap; see supplementary table S6, Supplementary Material online). Both recently extinct taxa are smaller than *M. antipodes*, with almost no overlap between the extant and extinct taxa in bone lengths. The skull closely resembles that of *M. antipodes* and differs from the contemporaneous *E. warhami* in its more slender upper beak and shallower mandible (without pronounced deepening at midpoint). We observed no osteological differentiation between the three *Megadyptes* taxa that could not be accounted for either by size or individual variation (as reflected in *M. antipodes* specimens), suggesting the proposed postcranial differences between *M. antipodes* and *M. waitaha* (see Boessenkool, Austin, et al. 2009) cannot consistently differentiate these taxa. Thus, we consider the Chatham taxon to represent an instance of isometric dwarfing and recommend the two recently extinct forms be recognized as subspecies of *Megadyptes antipodes*. We follow the New Zealand Bird Checklist Committee (Gill et al. 2010) in defining subspecies using the Diagnostic Species Concept, where it is expected that a subspecies will meet a 75% diagnosable criterion (Amadon 1949; Patten and Unit 2002).

## Discussion

### Timing of Penguin Evolution Linked to Island Emergence

While some studies have suggested that crown penguins began radiating in the Eocene (Baker et al. 2006), our divergence estimates (fig. 1c and supplementary table S4, Supplementary Material online) indicate a Miocene origin of crown penguins (Subramanian et al. 2013; Gavryushkina et al. 2017). Moreover, our results support the hypothesis that a large proportion of penguins diverged within the past 2 Ma

(Gavryushkina et al. 2017). We propose that this diversification pulse was tied to the emergence of islands, which created new opportunities for isolation and speciation.

While island emergence can spawn diverse biological radiations, several studies have detected island endemic lineages substantially predating island formation (Lewin 1985; Fraser et al. 2009). However, our estimated divergence dates for all island-endemic penguin taxa (i.e., those restricted to one island/archipelago) are consistently younger than the islands they inhabit (supplementary table S4, Supplementary Material online). While the ancestral distributions of clades are not always clear, the finding of numerous recently evolved taxa endemic to geologically young islands (Fleischer et al. 1998; Mendelson and Shaw 2005) strongly suggests that these lineages evolved in situ, rather than being relicts of formerly widespread species. Our study thus provides clear temporal genetic evidence linking penguin speciation to island formation (fig. 1c).

Our analysis found that *Eudyptes sclateri*/*E. warhami* diverged from *E. robustus*/*E. pachyrhynchus* 3.5–1.7 Ma, following the emergence of the Antipodes Islands (5 Ma) (Gamble and Morris 1989). Divergence estimates (95% Highest Posterior Densities) for both *Megadyptes antipodes richdalei* (0.4–0.1 Ma) and *Eudyptes warhami* (2.5–1.1 Ma) similarly postdate the emergence of the Chatham Islands 3 Ma (Campbell et al. 2008), and are concordant with divergence estimates for many endemic Chatham lineages, including plants (Heenan et al. 2010), insects (Trewick 2000), and birds (Mitchell, Wood, et al. 2014; Wood et al. 2014) (see supplementary fig. S13, Supplementary Material online). While the age of the Snares is unclear, our analysis of *E. robustus* suggests that they have been emergent for at least 1.4–0.5 Ma. The divergence between *E. moseleyi* and *E. chrysocome*/*E. filholi* 2.7–1.2 Ma corresponds with the emergence of Gough Island ~2.5 Ma (Maund et al. 1988), and populations presumably dispersed to the younger islands of the Tristan da Cunha archipelago, Amsterdam Island, and St Paul Islands (McDougall and Ollier 1982) via the Antarctic Circumpolar Current. The divergence between *E. chrysolophus chrysolophus* and the Macquarie Island endemic *E. chrysolophus schlegeli* (0.2–0.0 Ma) is concordant with the geological uplift of Macquarie Island 0.7 Ma (Adamson et al. 1996). The Galápagos endemic *Spheniscus mendiculus* diverged from its sister taxon *S. humboldti* 1.6–0.6 Ma shortly after the formation of several islands within this young archipelago (3 Ma). Similar founder speciation has previously been inferred for numerous Galápagos endemic taxa (Parent et al. 2008), including invertebrates (Parent and Crespi 2006; Sequeira et al. 2008), reptiles (Caccone et al. 1999), and birds (Bollmer et al. 2006).

Our finding that many recent speciation events among penguins are temporally linked to island formation may provide important clues for understanding evolutionary patterns in other island-endemic taxa. Islands are clearly speciation hotspots for terrestrial taxa, but the role of island emergence as a driver of speciation in marine taxa remains less clear (however see Mitchell, Wood, et al. 2014). The shag genus *Leucocarbo* similarly has endemic taxa associated with almost

every sub-Antarctic island (Marchant and Higgins 1990), providing a possible parallel example of recent founder speciation in the Southern Ocean. Time-calibrated genomic analysis provides an exceptional new tool for understanding the origins of such iconic southern biodiversity.

### Vulnerability of Island Taxa to Human-Induced Extinctions

Our study uncovered two new island-endemic penguin taxa: *Eudyptes warhami* and *Megadyptes antipodes richdalei*. The presence of their bones in middens, and lack of reliable historical sightings, suggests that these taxa were extirpated shortly after human settlement on the Chatham Islands (post-13th century AD; Maxwell and Smith 2015). These findings thus potentially represent important new examples of human-driven, Holocene extinction in the Pacific. *Eudyptes warhami* bones (cf. *E.* clade X) excavated from coastal middens demonstrate that the species was also hunted on mainland New Zealand (Cole et al. 2019). However, this does not prove the presence of a local breeding colony. In fact, many extant island endemic *Eudyptes* disperse widely during the nonbreeding period: *E. pachyrhynchus* (breeds only on mainland New Zealand) and *E. robustus* (breeds only on the Snares) are commonly observed in southern Australia during winter (Woehler 1992; Cole et al. 2018; Mattern et al. 2018); and *E. sclateri* (breeds only on the Antipodes Islands) is commonly observed in New Zealand (Robertson et al. 2017). As *E. warhami* is relatively rare in mainland subfossil penguin assemblages (represented by only seven specimens among hundreds of genetically identified penguin bones) (Boessenkool, Austin, et al. 2009; Rawlence, Perry, et al. 2015; Grosser et al. 2016; Cole et al. 2019), these mainland records fit the pattern that would be expected for nonbreeding individuals. In contrast, no *Megadyptes antipodes richdalei* bones have been detected in mainland subfossil assemblages (Boessenkool, Austin, et al. 2009; Rawlence, Perry, et al. 2015; Cole et al. 2019). This pattern fits with the limited dispersal exhibited by extant *Megadyptes* populations (Boessenkool, Star, et al. 2009).

### Conclusions

We find strong evidence for a Neogene radiation of crown penguins, and provide the first compelling evidence that island emergence drove Plio-Pleistocene penguin diversification. Such processes may also have driven diversification in the deeper past, as fossil data show much higher penguin diversities than present once existed in New Zealand (Ksepka and Ando 2011), Antarctica (Jadwiszczak 2006), Australia (Park and Fitzgerald 2012), and Africa (Thomas and Ksepka 2013). However, as most fossils from these regions are restricted to continental localities, and many islands have scant fossil records, the role of island formation in penguin diversification in the deep past remains obscured. Accordingly, if rates of island-mediated speciation were as high throughout the Cenozoic as in the Plio-Pleistocene, it is conceivable that fossils for a major proportion of extinct penguin taxa will never be found.

Previous studies based on traditional species concepts have struggled to account for recently evolved biological diversity. Particularly relevant are scenarios of species “divergence with gene flow,” where introgression may occur among closely related lineages (Rheindt and Edwards 2011). Although hybridization between closely related penguin species within *Spheniscus* and *Eudyptes* have occasionally been reported, solid confirmatory genetic evidence is lacking (White and Clausen 2002; Simeone et al. 2009; Morrison and Sagar 2014). While our study does not address the possibility of introgression among penguin taxa, future genome-wide analyses will provide insights into this question for penguins.

While our results reinforce the importance of islands in generating biodiversity, they also underscore the role of humans as agents of biodiversity loss, especially via the extinction of island-endemic taxa (Duncan et al. 2013). Today only *Eudyptula minor* breeds on the Chatham Islands, yet 500 years ago the archipelago held substantial penguin diversity, with two endemic taxa (*Eudyptes warhami* and *Megadyptes antipodes richdalei*) alongside *Eudyptula minor* and possibly *Eudyptes sclateri*. As many of the bones were from middens, our results provide direct evidence that *E. warhami* was hunted by humans. Although no *Megadyptes antipodes richdalei* remains examined in this study were directly associated with human activity, the near-simultaneous disappearance of both this subspecies and *Eudyptes warhami* suggests that both extirpations were linked to the arrival of humans to the Chatham Islands. Our results further emphasize the value of ancient DNA for elucidating biodiversity shifts, including the dramatic rise and fall of island avifauna (Waters and Grosser 2016).

## Materials and Methods

### DNA Extraction, Amplification, and Sequencing from Historical Samples

Historical skin samples from *Eudyptes filholi*, *E. robustus*, *E. sclateri*, *E. chrysolophus schlegeli*, and *E. c. chrysolophus* were obtained from the Museum of New Zealand Te Papa Tongarewa (Te Papa). Holocene fossil and archaeological bones from the Chatham Islands identified as *Eudyptes* based on morphology ( $n = 37$ ), and two each of *Megadyptes antipodes antipodes*, *M. a. waitaha*, *M. a. richdalei*, and *Eudyptes* clade X (Cole et al. 2019) were sourced from Te Papa, Canterbury Museum, and Auckland War Memorial Museum (supplementary table S1, Supplementary Material online). To avoid duplicate sampling of individuals, either left or right elements were sampled from any one site, or bones were sampled from different stratigraphic units within a site. DNA extractions were performed following rigorous ancient DNA protocols (Cooper and Poinar 2000) at four purpose-built ancient DNA laboratories: Department of Zoology (University of Otago, Dunedin) following Rohland et al. (2010) (bone) or Rawlence, Kennedy, et al. (2015) (museum skins); Landcare Research (Lincoln) following Thomson et al. (2014) (bone); Te Papa (Wellington) using the manufacturer’s protocol from the Qiagen DNeasy Tissue Kit (Qiagen)

(museum skins); and the Australian Centre for Ancient DNA (ACAD) following Brotherton et al. (2013).

For species identification, we followed Boessenkool, Austin, et al. (2009), Cole et al. (2018), and Cole et al. (2019), amplifying  $\leq 499$  bp of *cytochrome oxidase 1* (COI) (four overlapping 140–164 bp regions), 131 bp of *control region* (CR) in *Eudyptes*, and  $\leq 402$  bp of CR in *Megadyptes* (two overlapping 229–255 bp regions). PCRs (total volume = 12.5  $\mu$ l) were performed using 2 mg/ml BSA (Sigma), 1 $\times$  PCR buffer, 2 mM MgSO<sub>4</sub>, 80  $\mu$ M dNTP, 0.4  $\mu$ M each primer, 0.625 U HiFi Platinum Taq (Invitrogen), and 1  $\mu$ l DNA extract on a BIO-RAD MyCycler thermal cycler as follows: 94 °C for 3 min; 55 cycles of 94 °C for 30 s, 55 °C for 30 s, and 68 °C for 45 s; 68 °C for 10 min. PCR products were purified using SPRIselect (Beckman Coulter, Inc., Indianapolis, IN) and sequenced at the Manaaki Whenua Landcare Research sequencing facility (Auckland) on an Applied Biosystems 3500xL Genetic Analyzer. Contiguous sequences of COI and CR were assembled using Geneious v8.1.8 (Biomatters; Kearse et al. 2012) from high-quality bidirectional reads and checked manually. Due to postmortem DNA damage, when inconsistency between sequences from a given individual was observed (e.g., G-A and C-T transitions), additional PCRs and bidirectional sequencing were conducted, and a majority rule consensus was applied (Brotherton et al. 2007).

Phylogenetic trees were created using BEAST v2.4.7 (Bouckaert et al. 2014), with a relaxed log-normal clock and yule speciation model, 100 million MCMC generations sampling tree parameters every 1,000 generations, and a burn-in of 10%. Analyses were run in triplicate and combined using Log Combiner v2.4.7. We implemented the Akaike Information Criterion in JmodelTest2 (Darriba et al. 2012) to determine the most appropriate model of sequence evolution (Jukes Cantor for all genetic markers). We created two maximum clade credibility phylogenies using COI (supplementary figs. S1 and S2, Supplementary Material online), and one using the *Megadyptes* CR (supplementary fig. S4, Supplementary Material online). As is typical with ancient DNA, our data contained some missing sequence data. We constructed the first phylogeny which contained all COI data (supplementary fig. S2, Supplementary Material online), and a second phylogeny that contained only samples with 3–4 of the 4 overlapping fragments (75–100% of the four fragments) (supplementary fig. S1, Supplementary Material online). In addition, we included one sequence representative of all extant sphenisciform species, and wandering albatross (*Diomedea exulans*) as outgroup. For the *Megadyptes* phylogeny, we obtained 20 and 25 *M. antipodes antipodes* and *M. a. waitaha* sequences from GenBank, and one *Eudyptes chrysolophus* sequence as outgroup (supplementary fig. S4 and table S11, Supplementary Material online). We used PopArt (Leigh and Bryant 2015) to create the minimum spanning haplotype network (Bandelt et al. 1999) that included all *Eudyptes* CR sequences (supplementary fig. S3, Supplementary Material online).

## Enriched Mitogenomes from Subfossil Bones and Museum Skins

One to two Illumina libraries were created for *Eudyptes filholi* (AD253), *E. robustus* (AD270), *E. pachyrhynchus* (AD266), *E. sclateri* (AD302), *E. chrysolophus schlegeli* (AD415, AD416, AD417, AD419), *E. warhami* (cf *E. clade X*; AD156, AD157, AD161, AD162, AD309, AD342), *Megadyptes antipodes antipodes* (AD93, AD94), *M. a. waitaha* (AD91, AD289), and *M. a. richdalei* (AD88, AD95, ACAD12997) following Meyer and Kircher (2010), but using truncated adapters with unique 7-mer barcode sequences and a partial uracil-DNA-glycosylase treatment (Rohland et al. 2015). We used real-time PCR (rtPCR) to determine the appropriate number of cycles to amplify each library (see Carøe et al. 2018): two 10- $\mu$ l reactions were run per library containing 1  $\mu$ l of a 1:5 dilution of post-Bst product, 1 $\times$  High Fidelity PCR Buffer, 2 mM MgSO<sub>4</sub>, 0.25 mM dNTPs, 0.2  $\mu$ M IS7, and IS8 primers (see Meyer and Kircher 2010), 0.004 $\times$  ROX (Life Tech), 0.2 $\times$  SYBR (Life Tech), 0.56 M DMSO (Sigma–Aldrich), and 0.2 U Platinum Taq DNA Polymerase High Fidelity (ThermoFisher). The rtPCRs were run on a LightCycler 96 (Roche) as follows: 94 °C for 6 min; 40 cycles of 94 °C for 30 s, 60 °C for 30 s, and 68 °C for 40 s; and a high-resolution melt (95 °C for 1 min, 40 °C for 1 min, then a ramp from 65 °C to 97 °C). Each library was divided into 8 $\times$ 25  $\mu$ l PCRs containing: 3  $\mu$ l of post-Bst library product, 1 $\times$  High Fidelity PCR Buffer, 2 mM MgSO<sub>4</sub>, 0.25 mM dNTPs, 0.2  $\mu$ M IS7, and IS8 primers, and 0.5 U Platinum Taq DNA Polymerase High Fidelity (ThermoFisher). PCRs were run in a heated-lid thermal cycler as follows: 94 °C for 6 min; 10 to 22 cycles (determined by rtPCR) of 94 °C for 30 s, 60 °C for 30 s, and 68 °C for 40 s; and 68 °C for 10 min.

Libraries were enriched for avian mitochondrial DNA (except the CR) with commercially synthesized biotinylated 80-mer RNA baits (Arbor Biosciences, MI), designed from published mitogenome sequences for 27 modern birds (Neornithes), including two penguins (*Eudyptes* and *Megadyptes*) (see Mitchell, Llamas, et al. 2014). DNA-hybridization enrichment was performed according to the manufacturer's recommendations (myBaits protocol v1) except the incubation step, which we extended to 44 h (2 h at 60 °C, 12 h at 55 °C, 12 h at 50 °C, 17 h at 55 °C). After washing the bound DNA, the baits and DNA library were eluted in PCR master mix, which was then divided into 5 $\times$ 25  $\mu$ l reactions comprising: 1 $\times$  AmpliTaq Gold Buffer, 2.5 mM MgCl<sub>2</sub>, 0.25 mM dNTPs, 0.4  $\mu$ M indexed full-length adapter primers (IS4 and indexing primer; see Meyer and Kircher 2010), 1.25 U AmpliTaq Gold DNA Polymerase (Thermo Fisher). PCRs were run in a heated-lid thermal cycler as follows: 94 °C for 6 min; 15 cycles of 94 °C for 30 s, 60 °C for 30 s, and 72 °C for 45 s; and 72 °C for 10 min. Each amplified library was diluted to 2 nM and run on an Illumina MiSeq using 2 $\times$ 150 bp (paired-end) sequencing chemistry.

Reads were demultiplexed using “sabre” (<http://github.com/najoshi/sabre>; last accessed 14 August 2017) (default parameters: no mismatches allowed). Adapter sequences

were removed and paired-end reads were merged using AdapterRemoval v2.1.2 (Schubert et al. 2016). Low-quality bases were trimmed (<Phred20—minquality 4) and merged reads <25 bp were discarded (–minlength 25). Read quality was visualized using fastQC v0.10.1 (<http://www.bioinformatics.bbsrc.ac.uk/projects/fastqc>; last accessed August 14, 2007) before and after trimming to make sure the trimming was efficient. Collapsed reads from *Eudyptes sclateri* (AD302), *E. warhami* (AD342), and *Megadyptes antipodes richdalei* (ACAD12997) were mapped against the *Eudyptes chrysolophus* mitogenome (GenBank accession AP009189) using BWA v0.7.8 (Li and Durbin 2009) (aln -l 1024, -n 0.01, -o 2). Reads with a mapping quality Phred score >30 were selected using the SAMtools v1.4 (Li et al. 2009) view command (-q 30), and duplicate reads were discarded using “FilterUniqueSAMCons.py” (Kircher 2012). We created 50% (majority-rule) consensus sequences in Geneious. Collapsed reads from all other samples were mapped to these three new reference sequences (as described earlier), preliminary species assignments were made based on the reference to which the most reads mapped, and 50% consensus sequences were created based on the closest matching reference: *E. sclateri* (AD302) for all non-*warhami* *Eudyptes* samples, *E. warhami* (AD342) for all *E. warhami* samples and *Megadyptes antipodes richdalei* (ACAD12997) for all *Megadyptes* samples. All reads for each sample were then remapped to their respective consensus (as described earlier) and final higher stringency consensus sequences were created: 85% majority for all samples except *Eudyptes warhami*, which were called at 100% majority. A nucleotide was only called for sites with  $\geq 3\times$  coverage depth (sites with insufficient depth were called as “N”). For one *Megadyptes antipodes richdalei* sample (AD161 and AD88), we were able to combine the two sets of reads from the two libraries to create one sequence. For these samples, there were no ambiguities between reads that overlapped. We used MapDamage v2.0.6 (Jónsson et al. 2013) to ensure that damage patterns in our data were consistent with authentic ancient DNA (supplementary figs. S14–S17 and table S12, Supplementary Material online).

## Mitogenomes from Contemporary Blood

We created mitogenomes from whole blood of *Aptenodytes patagonicus* (Fortuna Bay, South Georgia), *Eudyptes moseleyi* (Amsterdam Island), *E. chrysolophus chrysolophus* (Marion Island), and *E. c. schlegeli* (Green Gorge, Macquarie Island) at the Beijing Genomics Institute, Hong Kong. DNA was extracted at BGI Hong Kong or the University of Oxford using a HiPure Blood DNA Midi Kit II or the Qiagen DNeasy Tissue Kit, respectively. We constructed 250 bp insert size libraries, and performed whole-genome paired-end sequencing on a BGISEq 500 platform with 150 bp read length. Mitogenomes were de novo assembled using SOAPdenovo-Trans (Xie et al. 2014) with  $\sim 6$  Gb data for each species. We raised the linkage support during the scaffolding step to improve accuracy and to avoid connections between mitochondrial reads and nuclear mitochondrial DNA segments (NUMTs). We used a hidden Markov model method (Krogh et al. 1994; Durbin et al. 1998; Wheeler and Eddy 2013) to filter candidate



mitochondrial sequences and remove potential false positive mitochondrial scaffolds, NUMTs, or sequences that did not map to avian mitochondrial genes, which we considered contamination.

### Phylogenetic Analysis

We aligned all mitogenomes (including 15 obtained from GenBank; [supplementary table S11, Supplementary Material online](#)) using the MUSCLE algorithm implemented in Geneious. As most of the mitogenomes were not enriched for the CR, we excluded this from genomes sequenced on the BGISEq 500 platform or those from GenBank. We provided PartitionFinder v2.1.1 ([Lanfear et al. 2016](#)) with an input of 30 regions: for each protein coding gene, a region corresponding to every third position counting from the first position (i.e., positions 1, 4, and 7) and a region corresponding to every third position counting from the second position (i.e., position 2, 5, and 8); 12S rRNA; 16S rRNA; concatenated tRNAs; and concatenated noncoding regions (108 bp) ([supplementary table S13, Supplementary Material online](#)). The two regions we defined for each protein coding gene correspond to the first and second codon positions, except for the last 178 bp of ND3, which are frameshifted by one position due to a single nucleotide insertion. Regions were defined by aligning our sequences with the *E. chrysocome* mitogenome (GenBank accession AP009189) using Geneious, and extracting and concatenating the gene regions for downstream analyses. Optimal partitioning schemes were chosen based on the Bayesian Information Criterion without a maximum likelihood starting tree ([Guindon et al. 2010; Lanfear et al. 2012](#)). We used Geneious to calculate genetic divergences among species using both the entire alignment ([supplementary table S2, Supplementary Material online](#)) and excluding any positions with missing data in the alignment ([supplementary table S3, Supplementary Material online](#)). We analyzed all partitioned alignments in BEAST to infer the topology of Sphenisciformes under a phylogenetic framework ([supplementary figs. S5 and S6, Supplementary Material online](#)). We explored two rooting strategies, using the outgroup *Phoebastria albatrus* (a member of Procellariiformes, commonly recognized as the sister order to penguins; [Ksepka et al. 2006](#)) and rooting the tree between *Aptenodytes/Pygoscelis* and all other penguins. All initial phylogenetic analyses were implemented with a Yule process speciation prior, under a single lognormal relaxed clock model. All phylogenetic analyses were conducted via the CIPRES Science Gateway v3.3 ([Miller et al. 2010](#)).

### Phylogenetic Analysis Using Fossil Calibrations

To calibrate mitogenomic evolution, we implemented a single lognormal relaxed clock model and constrained the ages of five nodes (four when *Phoebastria albatrus* was excluded) based on fossils ([fig. 1c](#) and [supplementary figs. S7–S9, Supplementary Material online](#); see Fossil Calibrations for details). To test the relative contribution of including the calibration stem penguin *Waimanu manneringi*, we ran multiple phylogenetic tests using the alignment that sampled one individual per species, with *Phoebastria albatrus* as an

outgroup ([supplementary fig. S7, Supplementary Material online](#)). The tests used the following calibration points: 1) only *Waimanu manneringi* ([supplementary fig. S7c, Supplementary Material online](#)); 2) all initial calibrations (including *W. manneringi*) ([supplementary fig. S7b, Supplementary Material online](#)); and 3) all initial calibrations (without *W. manneringi*) ([supplementary fig. S7a, Supplementary Material online](#)). The performance of each test was assessed by running the analysis without the data (i.e., priors only, see [Warnock et al. 2014](#)) to determine the relative contribution of the data and the priors to the posterior node age estimates. With *W. manneringi*, the effective priors for the crown nodes were much older than the initial specifications, yet without *W. manneringi* the split between Sphenisciformes and Procellariiformes became unrealistically young (based on fossil evidence) (see [supplementary fig. S7, Supplementary Material online](#)). This conflict could be due to a rate slowdown in the large-bodied penguin clade ([Ksepka and Phillips 2015](#)) and may be exacerbated by the long branch separating crown penguins from Procellariiformes (see [supplementary fig. S7, Supplementary Material online](#)). Therefore, we removed the outgroup *Phoebastria albatrus*, and ran the analysis on just Sphenisciformes without the *Waimanu manneringi* calibration point. Each test was run at a minimum of 50 million MCMC, and for each new alignment we reran PartitionFinder and a single uncalibrated phylogenetic analysis was performed (as above) to determine the topology (especially for *Aptenodytes/Pygoscelis* placements [which remained as sister taxa in all analyses]). To assess the impact of tree prior choice, we ran all analyses (with and without *Phoebastria albatrus*) using either a birth–death or calibrated Yule process ([supplementary figs. S8 and S9, Supplementary Material online](#)). Results did not differ substantially, so we consider only those that used the birth–death speciation prior ([fig. 1c](#) and [supplementary figs. S8 and S9a, Supplementary Material online](#)). After comparing the performance of each test, the final analyses were run using only the penguin taxa, with four internal calibration points (including a uniform prior for crown penguins) ([fig. 1c](#)). This final analysis was run for 100 million generations, and we sampled trees and parameter values every 1,000 generations. Parameter values were monitored and compared between chains in Tracer v1.6 to ensure convergence and ESSs >200. We combined sampled trees and parameter values from each chain using Log Combiner. The first 10% of each chain was discarded as burn-in using TreeAnnotator v1.8.3. We visualized the maximum clade credibility tree using FigTree v1.4.2.

### Fossil Calibrations

#### Calibrated Node 1

Sphenisciformes-Procellariiformes; Taxon: *Waimanu manneringi*; Specimen: CM zfa35, partial skeleton (holotype); Justification: Phylogenetic analyses (all based on CM zfa35 as the only published specimen of *W. manneringi*) universally support *Waimanu* being along the stem penguin lineage (e.g., [Ksepka et al. 2006; Slack et al. 2006; Chávez Hoffmeister 2014; Gavryushkina et al. 2017](#)). Minimum Age Constraint: 60.5 Ma; Maximum Age Constraint: 72.1 Ma; Prior Distribution:

lognormal; Mean: 3.7 (in real space); Standard Deviation: 1.0; Offset: 60.5; Justification: Biostratigraphy (*Hornibrookina teur-ensis* and *Chaismolithus bidens*) indicates a minimum age for the type locality of 60.5 Ma (Cooper 2004; Slack et al. 2006; Ogg et al. 2008). The maximum age constraint is the lower bound of the Maastrichtian Stage. Maastrichtian sites have yielded fossil diving birds such as the Northern Hemisphere hesperornithids and the Southern Hemisphere *Neogaeornis*, *Vegavis*, and *Polarornis*, indicating preservation potential for marine diving birds globally, and specifically within the geographic range of modern penguins.

#### Calibrated Node 2

Crown Spheniscidae; Taxon: *Madrynornis mirandus*; Specimen: MEF-PV 100, partial skeleton (holotype); Justification: *M. mirandus* was originally considered a close relative of *Eudyptes* (Acosta Hospitaleche et al. 2007; Ksepka and Clarke 2010) and later to possibly represent the sister taxon to crown Spheniscidae (Chávez Hoffmeister 2014; Chávez Hoffmeister et al. 2014). The most recent phylogenetic analysis using new characters from the holotype suggests that *Madrynornis* is more closely related to *Spheniscus* and *Eudyptula*, though this was weakly supported (trees placing the fossil with *Eudyptes* were only one step longer). Nevertheless, seven synapomorphies support crown status for *Madrynornis*, most compellingly the widely separated fossa temporalis, elongate processus retroarticularis, and small foramen ilioischadicum (Degrange et al. 2018). Given the strong evidence that *Madrynornis* is a crown penguin but uncertainty over the precise relationships of this taxon, we use *Madrynornis* to calibrate the penguin crown; Minimum Age Constraint: 9.7 Ma; Maximum Age Constraint: 25.2 Ma; Prior Distribution: uniform; Justification: The single specimen of *M. mirandus* was collected from the “Entrerriense” sequence of the Puerto Madryn Formation (Acosta Hospitaleche et al. 2007); deposited at  $10.0 \pm 0.3$  Ma (Scasso et al. 2001). The maximum age is the upper boundary of New Zealand’s Kokoamu Greensand, which has yielded many penguin specimens of a wide range of body sizes and at least five different species (all stem taxa). Because the boundary between the Kokoamu Greensand and the overlying Otekaike Limestone likely occurs near the upper Whaingaroan/Dunroonian boundary, we use the age of this boundary (25.2 Ma) in lieu of a more refined date. This maximum age for the crown is consistent with observations that Oligocene units in Australia and South America have also yielded exclusively stem penguins (no Oligocene penguins have yet been reported from Antarctica or Africa).

#### Calibrated Node 3

*Spheniscus-Eudyptula*; Taxon: *Spheniscus muizoni*; Specimen: MNHN PPI 147, partial skeleton (holotype); Justification: Göhlich (2007) listed characters supporting placement in the genus *Spheniscus*. This has been supported by subsequent phylogenetic analyses (e.g., Ksepka and Clarke 2010; Chávez Hoffmeister et al. 2014). Unambiguous synapomorphies of *Spheniscus* in the calibrating specimen include the straight

proximal border of the fossa tricipitalis in ventral view (only seen in *Spheniscus* and some *Palaeospheniscus* specimens) and extremely deep sulcus longitudinalis dorsalis medialis (only seen in *Spheniscus* and the otherwise very dissimilar *Aptenodytes*); Minimum Age Constraint: 9.2 Ma; Maximum Age Constraint: 23.03 Ma; Prior Distribution: lognormal; Mean: 4.4 (in real space); Standard Deviation: 1.0; Offset: 9.2; Justification: PPI 147 was collected from the Cerro la Bruja locality of the Pisco Formation in Peru. The original age estimate of 11–13 Ma for *Spheniscus muizoni* was based on general faunal divisions (Göhlich 2007). However, subsequent work (Brand et al. 2011) provides a revised age of 9.2 Ma for Cerro la Bruja. The maximum age is the base of the Miocene (23.03 Ma) (Gradstein 2012). This encompasses: 1) The well-studied South American early Miocene Gaiman Formation, which has yielded abundant stem penguin fossils (e.g., *Palaeosphneiscus*, *Paraptenodytes*, *Eretiscus*) but no crown penguins. 2) Miocene record of Australia, which has yielded specimens interpreted as being either stem penguins or too incomplete to be assigned to either the stem or crown (Park et al. 2016). 3) Miocene-Pliocene record of New Zealand, which has yielded crown species, none of which fall within the *Spheniscus-Eudyptula* clade. 4) The African record, which is limited to middle/late Miocene penguins of indeterminate status (Thomas and Ksepka 2013) and several early Pliocene crown species, none of which fall within the *Spheniscus-Eudyptula* clade (Ksepka and Thomas 2012).

#### Calibrated Node 4

*Eudyptes-Megadyptes*; Taxon: *Eudyptes* sp.; Specimen: NMNZ S.046318, partial skeleton; Justification: The strongly arched jugal bar in this specimen is a derived feature of *Eudyptes* (Thomas DB et al., unpublished data). Although it also occurs in some *Pygoscelis* species, tarsometatarsi referred to this species have the derived condition of the foramen vasculare proximale medialis perforating the crista medialis hypotarsi (rather than exiting distal to the crest) supporting a position close to *Eudyptes* and ruling out a relationship with *Pygoscelis*; Minimum Age Constraint: 3.06 Ma; Maximum Age Constraint: 25.2 Ma; Prior Distribution: lognormal; Mean: 7.04 (in real space); Standard Deviation: 1.0; Offset: 3.06; Justification: S.046318 is from the Late Pliocene Tangahoe Formation, Taranaki, New Zealand (Naish et al. 2005). The Tangahoe Formation has been tightly constrained between 3.36 and 3.06 Ma and is within the local Waipipian stage (3.7–3.0 Ma) and the international Piacenzian stage (3.6–2.58 Ma) (Naish et al. 2005; Raine et al. 2015). The formation was dated using magnetostratigraphic correlation to the  $\delta^{18}\text{O}$  timescale from Ocean Drilling Program Site 846, and the presence of Waipipian stage macro- and microfossils (Naish et al. 2005). *Eudyptes calauina* from the Horcón Formation of Chile is of similar age but is known from less complete material. Chávez Hoffmeister et al. (2014) recovered *E. calauina* within a polytomy including all extant species of *Eudyptes*. The Horcón Formation is considered Late Pliocene but no tighter dates are available for the horizon from which *E. calauina* is known. Thus, that species may be slightly older or younger than the

Taranaki *Eudyptes*. Because many species of the *Eudyptes* + *Megadyptes* clade occur on islands and have no pre-Holocene fossil records, we used a conservative Oligocene maximum that follows the same justification as that for crown penguins as a whole.

### Calibrated Node 5

*Aptenodytes-Pygoscelis*; **Taxon:** *Pygoscelis calderensis*; **Specimen:** SGO-PV 790, part skull; **Justification:** *P. calderensis* was described on the basis of three partial skulls. The holotype preserves a very shallow temporal fossa; a derived feature which is present only in *Aptenodytes* and *Pygoscelis*. It also preserves a shelf of bone bordering the supraorbital salt gland fossa, a derived feature which occurs in *Pygoscelis* (as well as *Megadyptes* and *Eudyptes*), but is absent in *Aptenodytes*. Together, these features support placement at least to the stem of *Pygoscelis*; **Minimum Age Constraint:** 6.3 Ma; **Maximum Age Constraint:** 25.2 Ma; **Prior Distribution:** log-normal; **Mean:** 6.0 (in real space); **Standard Deviation:** 1.0; **Offset:** 6.3; **Justification:** SGO-PV 790 was collected from a phosphatic horizon in the Bahía Inglesa Formation, several meters beneath an ash layer in the uppermost Lechero Member which gave a K-Ar age of  $7.6 \pm 1.3$  Ma (Marquardt et al. 2000; Godoy et al. 2003). The ash layer thus provides a minimum age for the fossil. Because both *Pygoscelis* and *Aptenodytes* occur predominantly in Antarctica and sub-Antarctic islands today, and the fossil record from Antarctica is relatively poor, we used a conservative Oligocene maximum that follows the same justification as that for crown penguins as a whole.

### Systematic Paleontology

We measured 12 elements from eight *Eudyptes* taxa ( $n = 87$ ) (supplementary table S5, Supplementary Material online), and up to 23 elements from each *Megadyptes* subspecies ( $n = 57$ ) (supplementary tables S6–S10, Supplementary Material online). Radiocarbon dates of terrestrial birds from the same localities as described material (Millener 1999) were recalibrated using the SHCal13 atmospheric curve (Hogg et al. 2013) via OxCal v4.3.2 (Bronk Ramsey 2017).

### Supplementary Material

Supplementary data are available at *Molecular Biology and Evolution* online.

### Acknowledgments

We thank M. Rayner (Auckland War Memorial Museum) for bone measurements; V. De Pietri, P. Scofield, E. Burns, and T. Webster for access to Canterbury and Otago Museum collections; J-C. Stahl for photographs; E. Fordyce, J. Scott, W. Lee, N. Mortimer, M. Knapp, and P. Scofield and T. Worthy for discussions; and S. Petersen and A. Black for field assistance. Ethics approval came from the University of Otago, University of Oxford, University of Cape Town, Zoological Society of London and BGI Hong Kong. Collection permits were provided by the Government of South Georgia and the South Sandwich Islands and the South African National Antarctic

Programme. This work was supported by the Marsden Fund (UOO1112, LCR1102), BGI Hong Kong, Australian Research Council, a National Science Foundation Award (DEB 1556615), a Rutherford Discovery Fellowship (RDF-MNZ1201), Landcare Research and the University of Otago. T.L.C. was funded by an Otago University Postgraduate Scholarship. Sequences and calibrated tree files are available on GenBank (MK290241–MK290284) and/or Figshare (doi: 10.6084/m9.figshare.c.4329029), and nomenclatural acts have been registered in ZooBank (urn: lsid: zoobank.org: act: 640EE978-13B5-4913-BB4E-6E16395325AC; urn: lsid: zoobank.org: act: 169A6F00-1564-4977-B56B-09005591A88E).

### References

- Acosta Hospitaleche C, Tambussi C, Donato M, Cozzuol M. 2007. A new Miocene penguin from Patagonia and its phylogenetic relationships. *Acta Palaeontol Pol.* 52:299–314.
- Adamson DA, Selkirk PM, Price DM, Ward N, Selkirk JM. 1996. Pleistocene uplift and palaeoenvironments of Macquarie Island: evidence from paleobeaches and sedimentary deposits. *Pap Proc Roy Soc Tasmania.* 130(2):25–32.
- Amadon D. 1949. The seventy-five percent rule for subspecies. *Condor* 51(6):250–258.
- Bacon CD, Baker WJ, Simmons MP. 2012. Miocene dispersal drives island radiations in the palm tribe Trachycarpeae (Arecaceae). *Syst Biol.* 61(3):426–442.
- Baker AJ, Pereira SL, Haddrath OP, Edge KA. 2006. Multiple gene evidence for expansion of extant penguins out of Antarctica due to global cooling. *Philos Trans R Soc Lond B Biol Sci.* 273(1582):11–17.
- Bandelt H, Forster P, Röhl A. 1999. Median-joining networks for inferring intraspecific phylogenies. *Mol Biol Evol.* 16(1):37–48.
- Bertelli S, Giannini NP. 2005. A phylogeny of extant penguins (Aves: sphenisciformes) combining morphology and mitochondrial sequences. *Cladistics* 21(3):209–239.
- Boessenkool S, Austin JJ, Worthy TH, Scofield P, Cooper A, Seddon PJ, Waters JM. 2009. Relict or colonizer? Extinction and range expansion of penguins in southern New Zealand. *Philos Trans R Soc Lond B Biol Sci.* 276(1658):815–821.
- Boessenkool S, Star B, Waters JM, Seddon PJ. 2009. Multilocus assignment analyses reveal multiple units and rare migration events in the recently expanded yellow-eyed penguin (*Megadyptes antipodes*). *Mol Ecol.* 18(11):2390–2400.
- Bollmer JL, Kimball RT, Whiteman NK, Sarasola JH, Parker PG. 2006. Phylogeography of the Galápagos hawk (*Buteo galapagoensis*): a recent arrival to the Galápagos Islands. *Mol Phylogenet Evol.* 39(1):237–247.
- Bouckaert R, Heled J, Kühnert D, Vaughan T, Wu C-H, Xie D, Suchard MA, Rambaut A, Drummond AJ. 2014. BEAST 2: a Software Platform for Bayesian Evolutionary Analysis. *PLoS Comput Biol.* 10(4):e1003537.
- Brand L, Urbina M, Chadwick A, DeVries TJ, Esperante R. 2011. A high resolution stratigraphic framework for the remarkable fossil cetacean assemblage of the Miocene/Pliocene Pisco Formation, Peru. *J S Am Earth Sci.* 31(4):414–425.
- Bronk Ramsey C. 2017. Methods for summarizing radiocarbon datasets. *Radiocarbon* 59(06):1809–1833.
- Brotherton P, Endicott P, Sanchez JJ, Beaumont M, Barnett R, Austin J, Cooper A. 2007. Novel high-resolution characterisation of ancient DNA reveals C > U-type base modification events as the sole cause of *post mortem* miscoding lesions. *Nucleic Acids Res.* 35(17):5717–5728.
- Brotherton P, Haak W, Templeton J, Brandt G, Soubrier J, Adler CJ, Richards SM, Der Sarkissian C, Ganslmeier R, Friederich S. 2013. Neolithic mitochondrial haplogroup H genomes and the genetic origins of Europeans. *Nat Commun.* 4:1764.

- Caccone A, Gibbs JP, Ketmaier V, Suatoni E, Powell JR. 1999. Origin and evolutionary relationships of giant Galápagos tortoises. *Proc Natl Acad Sci U S A*. 96:13223–13228.
- Campbell HJ, Begg J, Beu A, Carter B, Curtis N, Davies G, Emberson R, Given D, Goldberg J, Holt K. 2008. Geological consideration relating to the Chatham Islands, mainland New Zealand, and the history of New Zealand terrestrial life. *Geol Soc N Z Misc Publ*. 126.
- Carøe C, Gopalakrishnan S, Vinner L, Mak SST, Sinding MHS, Samaniego JA, Wales N, Sicheritz-Pontén T, Gilbert MTP. 2018. Single-tube library preparation for degraded DNA. *Methods Ecol Evol*. 9(2):410–419.
- Chávez Hoffmeister MC. 2014. Phylogenetic characters in the humerus and tarsometatarsus of penguins. *Pol Polar Res*. 35(3):469–496.
- Chávez Hoffmeister MC, Briceño JDC, Nielsen SN. 2014. The evolution of seabirds in the Humboldt Current: new clues from the Pliocene of central Chile. *PLoS One* 9(3):e90043.
- Christidis L, Boles WE. 2008. Systematics and taxonomy of Australian birds. Collingwood: CSIRO Publishing.
- Cole TL, Rawlence NJ, Dussex N, Ellenberg U, Houston DM, Mattern T, Miskelly CM, Morrison KW, Scofield RP, Tennyson AJ. 2019. Ancient DNA of crested penguins: testing for temporal genetic shifts in the world's most diverse penguin clade. *Mol Phylogenet Evol*. 131:72–79.
- Cole TL, Waters JM, Shepherd LD, Rawlence NJ, Joseph L, Wood JR. 2018. Ancient DNA reveals that the 'extinct' Hunter Island penguin (*Tasidyptes hunteri*) is not a distinct taxon. *Zool J Linn Soc Lond*. 182(2):459–464.
- Cooper A, Poinar HN. 2000. Ancient DNA: do it right or not at all. *Science* 289(5482):1139.
- Cooper RA. 2004/2. The New Zealand geological timescale. *Inst Geol Nucl Sci Mono*. 22.
- Cowie RH, Holland BS. 2006. Dispersal is fundamental to biogeography and the evolution of biodiversity on oceanic islands. *J Biogeogr*. 33(2):193–198.
- Darriba D, Taboada GL, Doallo R, Posada D. 2012. jModelTest 2: more models, new heuristics and parallel computing. *Nat Methods* 9(8):772.
- Darwin C. 1859. On the origins of species by means of natural selection. London: Murray.
- De Dinechin M, Ottval R, Quillfeldt P, Jouventin P. 2009. Speciation chronology of rockhopper penguins inferred from molecular, geological and palaeoceanographic data. *J Biogeogr*. 36(4):693–702.
- Degrange F, Ksepka DT, Tambussi CP. 2018. Redescription of the oldest crown clade penguin: cranial osteology, jaw myology, neuroanatomy, and phylogenetic affinities of *Madrynomis mirandus*. *J Vertebr Paleontol*. 38(2):e1445636.
- Duncan RP, Boyer AG, Blackburn TM. 2013. Magnitude and variation of prehistoric bird extinctions in the Pacific. *Proc Natl Acad Sci U S A*. p.201216511.
- Durbin R, Eddy SR, Krogh A, Mitchison GX. 1998. Biological sequence analysis: probabilistic models of proteins and nucleic acids. Cambridge: Cambridge University Press.
- Fleischer RC, McIntosh CE, Tarr CL. 1998. Evolution on a volcanic conveyor belt: using phylogeographic reconstructions and K-Ar-based ages of the Hawaiian Islands to estimate molecular evolutionary rates. *Mol Ecol*. 7(4):533–545.
- Fraser CI, Nikula R, Spencer HG, Waters JM. 2009. Kelp genes reveal effects of subantarctic sea ice during the Last Glacial Maximum. *Proc Natl Acad Sci U S A*. 106(9):3249–3253.
- Frugone MJ, Lowther A, Noll D, Ramos B, Pistorius P, Dantas GPM, Petry MV, Bonadonna F, Steinfurth A, Polanowski A, et al. 2018. Contrasting phylogeographic pattern among *Eudyptes* penguins around the Southern Ocean. *Nat Sci Rep*. 8:17481.
- Gamble JA, Morris PA. 1989. Sub-Antarctic and Chatham Islands. In: Johnson RJ, editor. Intraplate volcanism in eastern Australia and New Zealand. Cambridge (MA): Cambridge University Press. p. 169–171.
- Gathorne-Hardy FJ, Jones DT, Mawdsley NA. 2000. The recolonization of the Krakatau islands by termites (Isoptera), and their biogeographical origins. *Biol J Linn Soc*. 71(2):251–267.
- Gavryushkina A, Heath TA, Ksepka DT, Stadler T, Welch D, Drummond AJ. 2017. Bayesian total-evidence dating reveals the recent crown radiation of penguins. *Syst Biol*. 66(1):57–73.
- Gill B, Bell BD, Chambers GK, Medway DG, Palma RL, Scofield RP, Tennyson AJ, Worthy TH. 2010. Checklist of the birds of New Zealand. *N Z Ornithol Soc N Z*.
- Gillespie RG, Baldwin BG, Waters JM, Fraser CI, Nikula R, Roderick GK. 2012. Long-distance dispersal: a framework for hypothesis testing. *Trends Ecol Evol*. 27(1):47–56.
- Godoy E, Marquardt C, Blanco N. 2003. Carta Caldera: Región de Atacama. Servicio Nacional de Geología y Minería, Carta Geológica de Chile, Serie Geología Básica, escala 76:38 Santiago.
- Göhlich UB. 2007. The oldest fossil record of the extant penguin genus *Spheniscus*—a new species from the Miocene of Peru. *Acta Palaeontol Pol*. 52:285–298.
- Gradstein FM. 2012. The Geologic Time Scale 2012. Amsterdam: Elsevier.
- Grosser S, Rawlence NJ, Anderson CNK, Smith IWG, Scofield RP, Waters JM. 2016. Invader or resident? Ancient-DNA reveals rapid species turnover in New Zealand little penguins. *Proc R Soc B*. 283(1824):20152879.
- Grosser S, Scofield RP, Waters JM. 2017. Multivariate skeletal analyses support a taxonomic distinction between New Zealand and Australian *Eudyptula* penguins (Sphenisciformes: spheniscidae). *Emu* 117(3):276–283.
- Guindon S, Dufayard JF, Lefort V, Anisimova M, Hordijk W, Gascuel O. 2010. New algorithms and methods to estimate maximum-likelihood phylogenies: assessing the performance of PhyML 3.0. *Syst Biol*. 59(3):307–321.
- Heenan PB, Mitchell AD, De Lange PJ, Keeling J, Paterson AM. 2010. Late-Cenozoic origin and diversification of Chatham Islands endemic plant species revealed by analyses of DNA sequence data. *N Z J Bot*. 48(2):83–136.
- Hogg AG, Hua Q, Blackwell PG, Niu M, Buck CE, Guilderson TP, Heaton TJ, Palmer JG, Reimer PJ, Turney CS. 2013. SHCal13 Southern Hemisphere Calibration, 0–50,000 Years cal BP. *Radiocarbon* 55:1889–1903.
- Jadwiszczak P. 2006. Eocene penguins of Seymour Island, Antarctica: the earliest record, taxonomic problems and some evolutionary considerations. *Pol Polar Res*. 27:287–302.
- Jónsson H, Ginolhac A, Schubert M, Johnson P, Orlando L. 2013. mapDamage 2.0: fast approximate Bayesian estimates of ancient DNA damage parameters. *Bioinformatics* 29(13):1682–1684.
- Kearse M, Moir R, Wilson A, Stones-Havas S, Cheung M, Sturrock S, Buxton S, Cooper A, Markowitz S, Duran C, et al. 2012. Geneious Basic: an integrated and extendable desktop software platform for the organization and analysis of sequence data. *Bioinformatics* 28(12):1647–1649.
- Kircher M. 2012. Analysis of high-throughput ancient DNA sequencing Data. In: Ancient DNA: methods and protocols. Humana Press. p. 197–228.
- Krogh A, Brown M, Mian IS, Sjölander K, Haussler D. 1994. Hidden Markov models in computational biology: applications to protein modeling. *J Mol Biol*. 235(5):1501–1531.
- Ksepka DT, Ando T. 2011. Penguins past, present, and future: trends in the evolution of the Sphenisciformes. In: Dyke G, Kaiser G, editors. Living dinosaurs: the evolutionary history of modern birds. Chichester (United Kingdom): John Wiley & Sons Ltd. p. 155–186.
- Ksepka DT, Bertelli S, Giannini NP. 2006. The phylogeny of the living and fossil Sphenisciformes (penguins). *Cladistics* 22(5):412–441.
- Ksepka DT, Clarke JA. 2010. The basal penguin (Aves: sphenisciformes) *Perudyptes devriesi* and a phylogenetic evaluation of the penguin fossil record. *B Am Mus Nat Hist*. 337:1–77.
- Ksepka DT, Fordyce RE, Ando T, Jones CM. 2012. New fossil penguins (Aves: sphenisciformes) from the Oligocene of New Zealand reveal the skeletal plan of stem penguins. *J Vertebr Paleontol*. 32(2):235–254.
- Ksepka DT, Phillips MJ. 2015. Avian diversification patterns across the K-Pg boundary: influence of calibrations, datasets, and model misspecification. *Ann Mo Bot Gard*. 100(4):300–328.

- Ksepka DT, Thomas DB. 2012. Multiple cenozoic invasions of Africa by penguins (Aves, Sphenisciformes). *Proc R Soc B*. 279(1730):1027–1032.
- Lanfear R, Calcott B, Ho SY, Guindon S. 2012. PartitionFinder: combined selection of partitioning schemes and substitution models for phylogenetic analyses. *Mol Biol Evol*. 29(6):1695–1701.
- Lanfear R, Frandsen PB, Wright AM, Senfeld T, Calcott B. 2016. PartitionFinder 2: new methods for selecting partitioned models of evolution for molecular and morphological phylogenetic analyses. *Mol Biol Evol*. 34:772–773.
- Leigh JW, Bryant D. 2015. PopART: full-feature software for haplotype network construction. *Methods Ecol Evol*. 6(9):1110–1116.
- Lewin R. 1985. Hawaiian Drosophila: young islands, old flies. *Science* 229(4718):1072–1074.
- Li H, Durbin R. 2009. Fast and accurate short read alignment with Burrows-Wheeler transform. *Bioinformatics* 25(14):1754–1760.
- Li H, Handsaker B, Wysoker A, Fennel T, Ruan J, Homer N, Marth G, Abecasis G, Durbin R. 2009. The Sequence Alignment/Map (SAM) format and SAMtools. *Bioinformatics* 25(16):2078–2079.
- Losos JB, Ricklefs RE. 2009. Adaptation and diversification on islands. *Nature* 457(7231):830.
- Marchant S, Higgins PJ. 1990. Handbook of Australian, New Zealand and Antarctic birds. Vol. 1, Pt. B. Melbourne: Oxford University Press.
- Marquardt C, Blanco N, Godoy E, Lavenu A, Ortlieb L, Marchant M, Guzmán N. 2000. Estratigrafía del Cenozoico Superior en el área de Caldera (26°45'–28°S), III Región de Atacama. In: Congreso Geológico Chileno, No. 9, Actas: Puerto Varas. p. 504–508.
- Mattern T, Pütz K, Garcia-Borboroglu P, Ellenberg U, Houston DM, Long R, Lüthi B, Seddon PJ. 2018. Marathon penguins – reasons and consequences of long-range dispersal in Fiordland penguins/Tawaki during the pre-moult period. *PLoS One* 13(8):e0198688.
- Maund JG, Rex DC, Le Roex AP, Reid DL. 1988. Volcanism on Gough Island: a revised stratigraphy. *Geol Mag*. 125(02):175–181.
- Maxwell JJ, Smith IWG. 2015. A reassessment of settlement patterns and subsistence at Point Durham, Chatham Island. *Archaeol Ocean* 50(3):162–174.
- McDougall I, Ollier CD. 1982. Potassium-argon ages from Tristan da Cunha, south Atlantic. *Geol Mag*. 119(01):87–93.
- Mendelson TC, Shaw KL. 2005. Rapid speciation in an arthropod. *Nature* 433(7024):375–376.
- Meyer M, Kircher M. 2010. Illumina sequencing library preparation for highly multiplexed target capture and sequencing. *Cold Spring Harbor Protoc*. 2010(6):pdb-prot5448.
- Millener PR. 1999. The history of the Chatham Islands' bird fauna of the last 7000 years – a chronicle of change and extinction. In: Olson SL, ed. Avian paleontology at the close of the 20th century, Proceedings of the 4th International meeting of the Society of Avian Paleontology and Evolution. Washington, DC: Smithsonian Institution Press, 85–109.
- Miller MA, Pfeiffer W, Schwartz T. 2010. Creating the CIPRES Science Gateway for inference of large phylogenetic trees. In: Proceedings of the Gateway Computing Environments Workshop (GCE), 2010 Nov 14, New Orleans (LA). p. 1–8.
- Mitchell KJ, Llamas B, Soubrier J, Rawlence NJ, Worthy TH, Wood J, Lee MSY, Cooper A. 2014. Ancient DNA reveals elephant birds and kiwi are sister taxa and clarifies ratite bird evolution. *Science* 316(5898):898–900.
- Mitchell KJ, Wood JR, Scofield RP, Llamas B, Cooper A. 2014. Ancient mitochondrial genome reveals unsuspected taxonomic affinity of the extinct Chatham duck (*Pachyanas chathamica*) and resolves divergence times for New Zealand and sub-Antarctic brown teals. *Mol Phylogenet Evol*. 70:420–428.
- Morrison KW, Sagar PM. 2014. First record of interbreeding between a Snares crested (*Eudyptes robustus*) and erect-crested penguin (*E. sclateri*). *Notornis* 61:109–112.
- Naish TR, Wehland F, Wilson GS, Browne GH, Cook RA, Morgans HEG, Rosenberg M, King PR, Smale D, Nelson CS, et al. 2005. An integrated sequence stratigraphic, palaeoenvironmental, and chronostratigraphic analysis of the Tangahoe Formation, southern Taranaki coast, with implications for mid-Pliocene (c. 3.4–3.0 Ma) glacio-eustatic sea-level changes. *J Roy Soc New Zeal*. 35(1–2):151–196.
- Ogg J, Ogg GG, Gradstein FM. 2008. The concise geologic time scale. Cambridge: Cambridge University Press.
- Parent CE, Cannone A, Petren K. 2008. Colonization and diversification of Galápagos terrestrial fauna: a phylogenetic and biogeographical synthesis. *Philos Trans R Soc Lond B Biol Sci*. 368:3347–3361.
- Parent CE, Crespi BJ. 2006. Sequential colonization and diversification of Galápagos endemic land snail genus *Bulimulus* (Gastropoda, Stylommatophora). *Evolution* 60(11):2311–2328.
- Park T, Fitzgerald EMG, Gallagher SJ, Tomkins E, Allan T. 2016. New miocene fossils and the history of penguins in Australia. *PLoS One* 11(4):e0153915.
- Park TR, Fitzgerald EM. 2012. A review of Australian fossil penguins (Aves: sphenisciformes). *Mem Mus Vic*. 69:309–325.
- Patten MA, Unit P. 2002. Diagnosability versus mean differences of sage sparrow subspecies. *The Auk* 119(1):26–35.
- Paulay G. 1994. Biodiversity on oceanic islands: its origin and extinction. *Am Zool*. 34(1):134–144.
- Raine JJ, Beu AG, Boyes AF, Campbell H, Cooper RA, Crampton JS, Crundwell MP, Hollis CJ, Morgans HE. 2015. Revised calibration of the New Zealand Geological Timescale: nZGT2015/1. *GNS Science Report 2012/39 (GNS Science, Lower Hutt NZ)* p.53.
- Ramos B, González-Acuña D, Loyola DE, Johnson WE, Parker PG, Massaro M, Dantas GP, Miranda MD, Vianna JA. 2018. Landscape genomics: natural selection drives the evolution of mitogenome in penguins. *BMC Genomics* 19:53.
- Rawlence NJ, Kennedy M, Anderson CN, Prost S, Till CE, Smith IW, Scofield RP, Tennyson AJ, Hamel J, Lallas C, et al. 2015. Geographically contrasting biodiversity reductions in a widespread New Zealand seabird. *Mol Ecol*. 24(18):4605–4616.
- Rawlence NJ, Perry GLW, Smith IWG, Scofield RP, Tennyson AD, Matisoo-Smith EA, Boessenkool S, Austin JJ, Waters JM. 2015. Radiocarbon-dating and ancient DNA reveal rapid replacement of extinct prehistoric penguins. *Quat Sci Rev*. 112:59–65.
- Rheindt FE, Edwards SV. 2011. Genetic introgression: an integral but neglected component of speciation in birds. *The Auk* 128(4):620–632.
- Robertson HA, Baird K, Dowding JE, Elliott GP, Hitchmough RA, Miskelly CM, McArthur N, O'Donnell CFJ, Sagar CFJ, Scofield RP, et al. 2017. Conservation status of New Zealand birds, 2016. New Zealand Threat Classification Series 19. Publishing Team, New Zealand Department of Conservation.
- Rohland N, Harney E, Mallick S, Nordenfelt S, Reich D. 2015. Partial uracil-DNA-glycosylase treatment for screening of ancient DNA. *Philos Trans R Soc Lond B Biol Sci*. 370(1660):20130624.
- Rohland N, Siedel H, Hofreiter M. 2010. A rapid column-based ancient DNA extraction method for increased sample throughput. *Mol Ecol Resour*. 10(4):677–683.
- Scasso RA, McArthur JM, del Río CJ, Martínez S, Thirlwall MF. 2001. 87Sr/86Sr Late Miocene age of fossil molluscs in the 'Entrerriense' of the Valdés Peninsula (Chubut, Argentina). *J S Am Earth Sci*. 14(3):319–329.
- Schubert M, Lindgreen S, Orlando L. 2016. AdapterRemoval v2: rapid adapter trimming, identification, and read merging. *BMC Res Notes* 12:88.
- Sequeira AS, Sijapati M, Lanteri AA, Roque Albelo L. 2008. Nuclear and mitochondrial sequences confirm complex colonization patterns and clear species boundaries for flightless weevils in the Galápagos archipelago. *Philos Trans R Soc Lond B Biol Sci*. 363(1508):3439–3451.
- Shaughnessy PD. 1975. Variation in facial colour of the Royal Penguin. *Emu* 75(3):147–152.
- Shaw KL, Gillespie RG. 2016. Comparative phylogeography of oceanic archipelagos: hotspots for inferences of evolutionary process. *Proc Natl Acad Sci U S A*. 113(29):7986–7993.
- Simeone A, Hiriart-Bertrand L, Reyes-Arriagada R, Halpern M, Dubach J, Wallace R, Pütz K, Lüthi B. 2009. Heterospecific pairing and hybridization between wild Humboldt and Magellanic penguins in southern Chile. *The Condor* 111(3):544–550.

- Sinton WC, Hauff F, Hoernle K, Werner R. 2018. Age progressive volcanism opposite Nazca plate motion: insights from seamounts on the northeastern margin of the Galapagos Platform. *Lithos* 310:342–354.
- Slack KE, Jones CM, Ando T, Harrison GL, Fordyce RE, Arnason U, Penny D. 2006. Early penguin fossils, plus mitochondrial genomes, calibrate avian evolution. *Mol Biol Evol.* 23(6):1144–1155.
- Subramanian S, Beans-Picón G, Swaminathan SK, Millar CD, Lambert DM. 2013. Evidence for a recent origin of penguins. *Biol Lett.* 9(6):20130748.
- Tennyson AJD, Millener PR. 1994. Bird extinctions and fossil bones from Mangere Island, Chatham Islands. *Notornis* 41(Suppl):165–178.
- Thomas DB, Ksepka DT. 2013. A history of shifting fortunes for African penguins. *Zool J Linn Soc Lond.* 168(1):207–219.
- Thomson VA, Lebrasseur O, Austin JJ, Hunt TL, Burney DA, Denham T, Rawlence NJ, Wood JR, Gongora J, Girdland Flink L, et al. 2014. Using ancient DNA to study the origins and dispersal of ancestral Polynesian chickens across the Pacific. *Proc Natl Acad Sci U S A.* 111(13):4826–4831.
- Trewick SA. 2000. Molecular evidence for dispersal rather than vicariance as the origin of flightless insect species on the Chatham Islands, New Zealand. *J Biogeogr.* 27(5):1189–1200.
- Warham J. 1975. The crested penguins. In: *The biology of penguins.* (Ed. B. Stonehouse) p. 189–269.
- Warnock RCM, Parham JF, Joyce WG, Lyson TR, Donoghue PCJ. 2014. Calibration uncertainty in molecular dating analyses: there is no substitute for the prior evaluation of time priors. *Proc R Soc B.* 282(1798):20141013.
- Waters JM, Fraser CI, Hewitt GM. 2013. Founder takes all: density-dependent processes structure biodiversity. *Trends Ecol Evol.* 28(2):78–85.
- Waters JM, Grosser S. 2016. Managing shifting species: ancient DNA reveals conservation conundrums in a dynamic world. *Bioessays* 38(11):1177–1184.
- Wheeler TJ, Eddy SR. 2013. nhmmer: DNA homology search with profile HMMs. *Bioinformatics* 29(19):2487–2489.
- White RW, Clausen AP. 2002. Rockhopper *Eudyptes chrysocome chrysocome* x Macquarie *E. chrysolophus* penguin hybrids apparently breeding in the Falkland Islands. *Mar Ornithol.* 30:40–42.
- Woehler EJ. 1992. Records of vagrant penguins from Tasmania. *Mar Ornithol.* 20:61–73.
- Woehler EJ. 1995. Bill morphology of Royal and Macaroni Penguins, and geographic variation within eudyptid penguins. The penguins. Chipping Norton: Surrey Beatty & Sons Pty Ltd. p. 319–330.
- Wood J, Alcover J, Blackburn T, Bover P, Duncan R, Hume J, Louys J, Meijer H, Rando J, Wilmshurst J. 2017. Island extinctions: patterns, processes, and potential for ecosystem restoration. *Environ Conserv.* 44(04):348–358.
- Wood JR, Mitchell KJ, Scofield RP, Tennyson AJ, Fidler AE, Wilmshurst JM, Llamas B, Cooper A. 2014. An extinct nestorid parrot (Aves, Psittaciformes, Nestoridae) from the Chatham Islands, New Zealand. *Zool J Linn Soc Lond.* 172(1):185–199.
- Xie Y, Wu G, Tang J, Luo R, Patterson J, Liu S, Huang W, He G, Gu S, Li S, et al. 2014. SOAPdenovo-Trans: de novo transcriptome assembly with short RNA-Seq reads. *Bioinformatics* 30(12):1660–1666.
- Zusi RL. 1975. An interpretation of skull structure in penguins. In: Stonehouse B, editor. *The biology of penguins.* Baltimore: University Park Press. p. 55–84.
